# Supplementary material for: Injectable conductive hydrogel electrodes for minimally invasive neural interfaces
Source: Royal Society of Chemistry journal article supplement (doi:10.1039/d4tb00679h), 2024-01-01
Supplement: d4tb00679h1.pdf [file d4tb00679h1.pdf]

### Supplementary Information

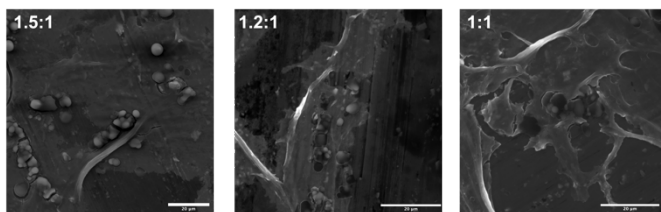

**SI Figure 1.** Representative SEM images of fibres for 1.5:1, 1.2:1, and 1:1 formulations. Scale bars for all images = 20  $\mu\text{m}$ .

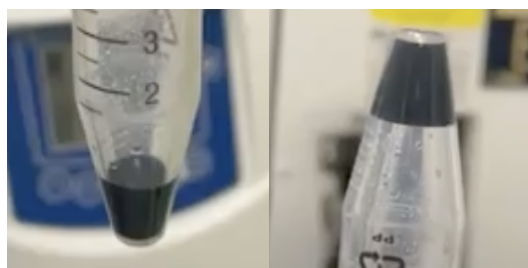

**A**

**B**

**SI Figure 2.** Representative images showing final PEDOT:PSS/AA gel. (A) PEDOT:PSS/Acetic acid gel

following batch emulsion and after removing supernatant post-cleaning. (B) When inverted, gel self-supports against gravity. Scale bars for both images = 1 cm.
